# Supplementary material for: Bias-free photoelectrochemical H2O2 production with a solar-to-fuel conversion efficiency of 2.33%
Source: Royal Society of Chemistry journal article supplement (doi:10.1039/d3se00290j), 2023-01-01
Supplement: d3se00290j1.pdf [file d3se00290j1.pdf]

Supporting Information

**Bias-free photoelectrochemical H<sub>2</sub>O<sub>2</sub> production with a solar-to-fuel conversion efficiency of 2.33%**

Dan Zhu, Chao Feng, Zeyu Fan, Beibei Zhang, Xin Luo and Yanbo Li\*

Institute of Fundamental and Frontier Sciences, University of Electronic Science and Technology of China, Chengdu 610054, China.

\*E-mail: [yanboli@uestc.edu.cn](mailto:yanboli@uestc.edu.cn)

## Experimental details

**Materials.** Ordered mesoporous carbon (CMK-3), anion exchange ionomer (Fumion FAA-3), and carbon cloth (CeTech W1S1011) were purchased from SCI Materials Hub. Magnesium oxide (MgO, 99.99% in purity) and tantalum oxide (Ta<sub>2</sub>O<sub>5</sub>, 99.99% in purity) evaporation sources and niobium (Nb) foil (0.1 mm in thickness, 99.99% in purity) were purchased from ZhongNuo Advanced Material (Beijing) Technology. H<sub>3</sub>BO<sub>3</sub> (99.5% in purity), NiSO<sub>4</sub>·6H<sub>2</sub>O (99.99% in purity), Co(NO<sub>3</sub>)<sub>2</sub>·6H<sub>2</sub>O (99.99% in purity), FeSO<sub>4</sub>·7H<sub>2</sub>O (99.95% in purity), KOH (95% in purity) were purchased from Aladdin Chemicals. H<sub>2</sub>O<sub>2</sub> (30% in purity) aqueous solution was purchased from Chengdu Kelong Chemicals. All the chemicals were used as-received without purification.

**Preparation of Mg:Ta<sub>3</sub>N<sub>5</sub>/NiCoFe-B<sub>i</sub> photoanode.** The gradient Mg-doped Ta<sub>3</sub>N<sub>5</sub> thin films were prepared by dual-source electron beam evaporation and thermal nitridation following our previously reported procedure<sup>1</sup>. The Nb foils (1×1 cm<sup>2</sup> or 3.33×3 cm<sup>2</sup> in size) and quartz glass (1×1 cm<sup>2</sup> in size) were cleaned by ultrasonication in precision detergent (Alconox), deionized water, acetone, and isopropanol, each for 15 min. The Nb foils were then etched with a mixed solution (HF: HNO<sub>3</sub>: H<sub>2</sub>O = 1:2:7) for 2 min, rinsed with deionized water, and dried under a stream of nitrogen. Gradient Mg-doped tantalum oxide (Mg:TaO<sub>x</sub>) thin films were deposited on the Nb foil and quartz glass substrates by dual-source electron beam evaporation (Angstrom Engineering AMOD) using MgO and Ta<sub>2</sub>O<sub>5</sub> as the evaporation sources. The deposition rate of Ta<sub>2</sub>O<sub>5</sub> was fixed at 5 Å/s, while the deposition rate of MgO varied linearly from 0.9 to 0.4 Å/s. The thickness of the deposited Mg:TaO<sub>x</sub> film was approximately 680 nm. The prepared Mg:TaO<sub>x</sub> precursor films were then heated in a horizontal quartz tube furnace at 1273 K for 6 h under 200 sccm NH<sub>3</sub> flow to obtain gradient Mg:Ta<sub>3</sub>N<sub>5</sub> films. The back side of the Nb substrate was attached to a copper wire by soldering with indium and then encapsulated with epoxy resin (Araldite). The electrodes were etched with a mixture of HF:HNO<sub>3</sub>:H<sub>2</sub>O (1:2:7 in v/v) for 20 s and rinsed with deionized water

to prepare a fresh surface for co-catalyst modification. NiCoFe-B<sub>i</sub> co-catalyst was deposited on the gradient Mg:Ta<sub>3</sub>N<sub>5</sub> photoanode by photo-assisted electrodeposition. The deposition solution was a 0.25 M potassium borate (K<sub>2</sub>B<sub>4</sub>O<sub>7</sub>·4H<sub>2</sub>O) buffer (pH 10) containing 2 mM NiSO<sub>4</sub>, 0.5mM Co(NO<sub>3</sub>)<sub>2</sub> and 0.8 mM FeSO<sub>4</sub>. Photo-assisted electrodeposition was carried out in the solution under Ar purge and magnetic stirring at a constant current density of 30 μA/cm<sup>2</sup> for 10 min under the illumination of AM 1.5G simulated sunlight. After deposition, the electrodes were rinsed with deionized water.

**Preparation of CC/CMK-3 cathode.** The CC/CMK-3 cathode was prepared by drop-casting CMK-3 ink onto the carbon cloth (CC). The CMK-3 ink was prepared by adding 3.4 mg of CMK-3 catalyst into a mixture of 0.41 ml of deionized water, 1.63 ml of isopropanol, and 0.36 ml of Fumion FAA-3, followed by ultrasonication for 2 h. The carbon cloth was cut into 1 × 1 cm<sup>2</sup> or 6 × 6 cm<sup>2</sup> pieces and placed on a hotplate heated at 90 °C. Then, the CMK-3 ink was drop-casted onto the carbon cloth at a loading amount of 60 μL/cm<sup>2</sup> (i.e., 0.085 mg/cm<sup>2</sup> of CMK-3 catalyst) and left on the hotplate for 15 min. Carbon paper/CMK-3 cathode loaded with the same amount of CAM 1.5G simulated sunlight illumination different amounts of CMK-3 catalyst were prepared in a similar way.

**Photoelectrochemical measurements of the Mg:Ta<sub>3</sub>N<sub>5</sub> photoanode.** The PEC properties of the Mg:Ta<sub>3</sub>N<sub>5</sub> photoanode for water oxidation were measured on a potentiostat (BioLogic SP-200) in three-electrode configuration using a Pt counter electrode and a Hg/HgO reference electrode. The Pt cathode chamber and the photoanode chamber were separated using a Nafion 117 membrane. A class AAA solar simulator (SAN-EI ELECTRIC, XES-40S3-TT) was used as the light source, and the irradiance was adjusted to 100 mW cm<sup>-2</sup> using a certified reference cell (Konica-Minolta AK-200). The temperature of the electrolyte (1 M KOH, pH 13.6) was maintained at 283 K using a constant temperature water bath during the PEC test. Linear sweep voltammograms (J-V curves) were recorded under an anodic scan at a rate of 10

mV s<sup>-1</sup> under simulated sunlight. Chronoamperometry test was conducted at an applied potential of 1 V versus RHE under simulated sunlight.

**Photoluminescence measurement of Mg:Ta<sub>3</sub>N<sub>5</sub> film.** The low-temperature PL spectrum of the Mg:Ta<sub>3</sub>N<sub>5</sub> film deposited on a quartz glass substrate was measured using a Picoquant FluoTime 300 system under the excitation of a 510 nm pico-second laser. The temperature of the sample was cooled using a closed-cycle He cryostat (ARS DE-202) to ~10 K.

**Calibration of H<sub>2</sub>O<sub>2</sub> concentrations in 1 M KOH electrolyte.** The amount of H<sub>2</sub>O<sub>2</sub> in the 1 M KOH electrolyte was determined by colorimetry of the color changes from Fe<sup>2+</sup> to Fe<sup>3+</sup> using a UV-vis spectrophotometer<sup>2,3</sup>:

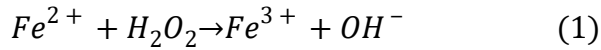

1 M KOH solutions containing different concentrations (45.7-482.3 μmol/L) of H<sub>2</sub>O<sub>2</sub> was prepared. 2 mL of the above solutions were mixed with 1.8 mL HCl (3 M) and 0.4 mL FeSO<sub>4</sub> (0.1 M) and stirred for 2 min. Then the absorption spectra of the solutions were measured with a UV-vis spectrophotometer (Shimadzu UV-2600). The calibration equation was obtained by linearly fitting the peak intensity of the UV-vis spectra at 330 nm versus the H<sub>2</sub>O<sub>2</sub> concentrations (Figure S1):

$$y = 6.2 + 481.8x \quad (2)$$

where  $x$  is the intensity of the absorption peak at 330 nm and  $y$  is the H<sub>2</sub>O<sub>2</sub> concentration.

**Electrochemical measurements of the CC/CMK-3 cathode.** The electrochemical properties of the CC/CMK-3 cathode for O<sub>2</sub> reduction reaction were measured using a potentiostat (BioLogic SP-200) in a three-electrode configuration. CC/CMK-3 cathode (1 × 1 cm<sup>2</sup> in size), Pt wire, and Hg/HgO electrode were used as the working electrode, counter electrode, and reference electrode, respectively. 1 M KOH (pH 13.6) was used as the electrolyte and the temperature of the electrolyte was maintained at 283 K using

a constant temperature water circulator. During the electrochemical measurements, the electrolyte was magnetically stirred and the air was blown to the surface of the CC/CMK-3 cathode using a circulation pump. Linear scanning voltammograms (current-potential curves) were recorded in a cathodic scan at a rate of 10 mV/s. The potential measured versus the Hg/HgO reference electrode ( $E_{Hg/HgO}$ ) was converted to the RHE scale ( $E_{RHE}$ ) according to the Nernst equation,

$$E_{RHE} = E_{Hg/HgO} + 0.0582 \times pH + 0.098 \quad (3)$$

Chronoamperometry curves were measured at an applied potential of 0.65 V versus RHE. During the chronoamperometry tests, 2 mL of the electrolyte was taken every 20 min, mixed with 1.8 mL HCl (3 M) and 0.4 mL FeSO<sub>4</sub> (0.1 M), and stirred for 2 min. The absorption spectra of the mixed solutions were then measured with a UV-vis spectrophotometer (Shimadzu UV-2600). The H<sub>2</sub>O<sub>2</sub> concentrations were then calculated using the calibration equation (Eqn. 2). The Faradaic efficiency was calculated according to the following equation:

$$FE (\%) = \frac{V \cdot n}{\frac{Q}{2e^-} \times \frac{1}{N_A}} \times 100\% \quad (4)$$

where FE is the Faradaic efficiency; V is the volume of the solution, in L; n is the H<sub>2</sub>O<sub>2</sub> concentration in the solution, in  $\mu\text{mol/L}$ ; Q is the total charge passed, in C;  $e^-$  is the electron charge,  $1.602 \times 10^{-19}$  C;  $N_A$  is Avogadro's constant,  $6.02 \times 10^{23}$ .

### **Bias-free H<sub>2</sub>O<sub>2</sub> production properties of the Mg:Ta<sub>3</sub>N<sub>5</sub>||Nafion||CC/CMK-3 device.**

The bias-free photoelectrochemical H<sub>2</sub>O<sub>2</sub> production using the Mg:Ta<sub>3</sub>N<sub>5</sub>/NiCoFe-B<sub>i</sub> photoanode and the CC/CMK-3 cathode was conducted in a tailor-made cell equipped with gas/electrolyte inlets/outlets and a quartz window (Figures 3 & S6). The photoanode and cathode chambers were separated using a Nafion 117 membrane. The anolyte (1 M KOH, pH 13.6) was circulated in the photoanode chamber using a circulation pump. The catholyte (1 M KOH, pH 13.6) and air were circulated in the

cathode chamber using two separate circulation pumps. The temperature of both the anolyte and catholyte was maintained at 283 K using a water chiller. CC/CMK-3 cathode with a size of  $5 \times 5 \text{ cm}^2$  was used and the active area of the Mg:Ta<sub>3</sub>N<sub>5</sub>/NiCoFe-B<sub>i</sub> photoanode was approximately  $0.95 \text{ cm}^2$ . Photoelectrochemical H<sub>2</sub>O<sub>2</sub> production properties of the assembled Mg:Ta<sub>3</sub>N<sub>5</sub>||Nafion||CC/CMK-3 devices were tested using a potentiostat (BioLogic SP-200) in a two-electrode configuration. The H<sub>2</sub>O<sub>2</sub> concentration in the electrolyte was measured every 20 min during the reaction using the Fe<sup>2+</sup> colorimetric method. The solar-to-fuel conversion efficiency (*STF*) was calculated from the amount of H<sub>2</sub>O<sub>2</sub> produced under simulated or natural sunlight,

$$STF(\%) = \frac{\Delta G_{H_2O_2} \times n_{H_2O_2}}{t_{ir} \times S_{ir} \times I_{AM}} \times 100\% \quad (5)$$

where  $\Delta G_{H_2O_2}$  is the Gibbs free energy of H<sub>2</sub>O<sub>2</sub> generation, 117 KJ/mol;  $n_{H_2O_2}$  is the amount of H<sub>2</sub>O<sub>2</sub> produced (mol);  $t_{ir}$  and  $S_{ir}$  represent irradiation time (s) and irradiated area (m<sup>2</sup>), respectively;  $I_{AM}$  is irradiation intensity, which equals to  $1000 \text{ W/m}^2$  for AM 1.5G simulated sunlight. The natural sunlight intensity during the outdoor test was monitored using a certified reference cell (Konica-Minolta AK-200).

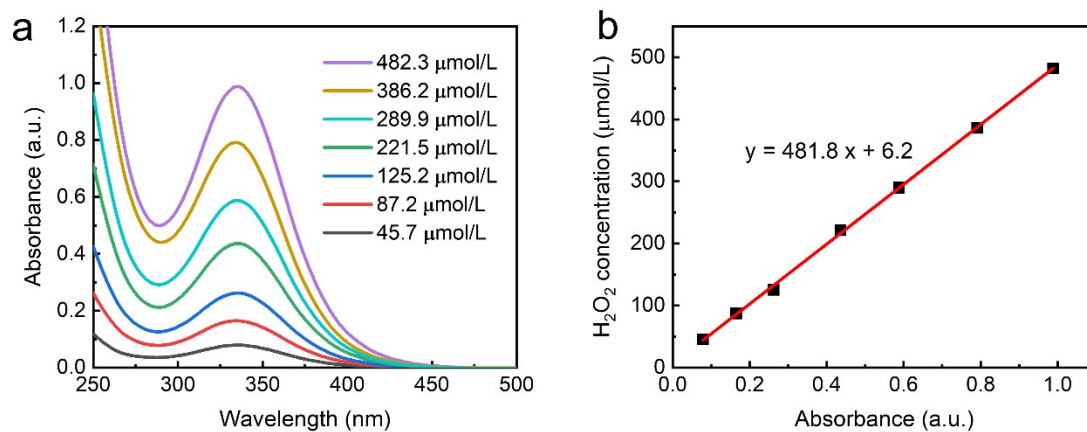

**Figure S1.** (a) UV-vis absorption spectra of 1 M KOH electrolyte with H<sub>2</sub>O<sub>2</sub> different concentrations using the Fe<sup>2+</sup> colorimetric method. (b) Calibration curve of the H<sub>2</sub>O<sub>2</sub> concentration in 1 M KOH electrolyte. Inset shows the calibration equation for determining the H<sub>2</sub>O<sub>2</sub> concentration.

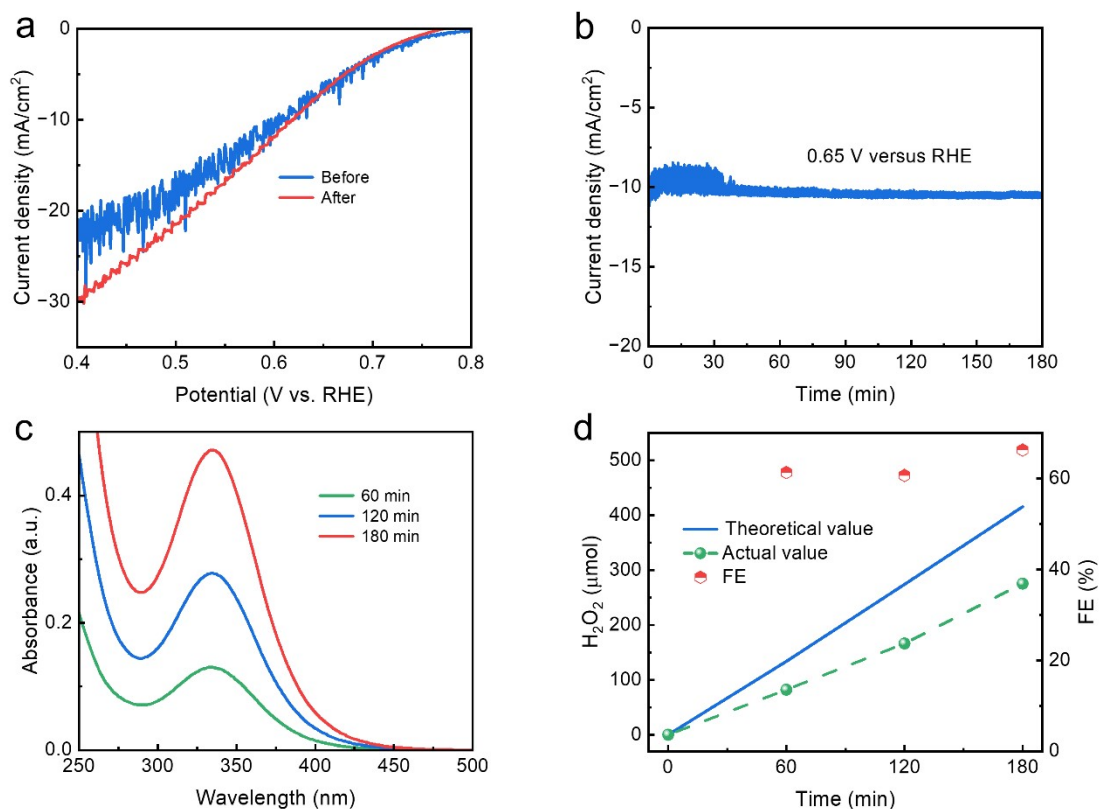

**Figure S2.** (a) J-V curves of the carbon paper (CP) loaded with 0.085 mg/cm<sup>2</sup> CMK-3 catalyst measured in 1 M KOH electrolyte at 283 K before and after the stability test. (b) Steady-state current measured at 0.65 V vs. RHE in 1 M KOH electrolyte at 283 K. (c) UV-vis absorption spectra of the electrolyte at different times during the stability test using the Fe<sup>2+</sup> colorimetric method. (d) Amount of H<sub>2</sub>O<sub>2</sub> produced and the calculated Faradaic efficiency (FE) of the CP/CMK-3 cathode.



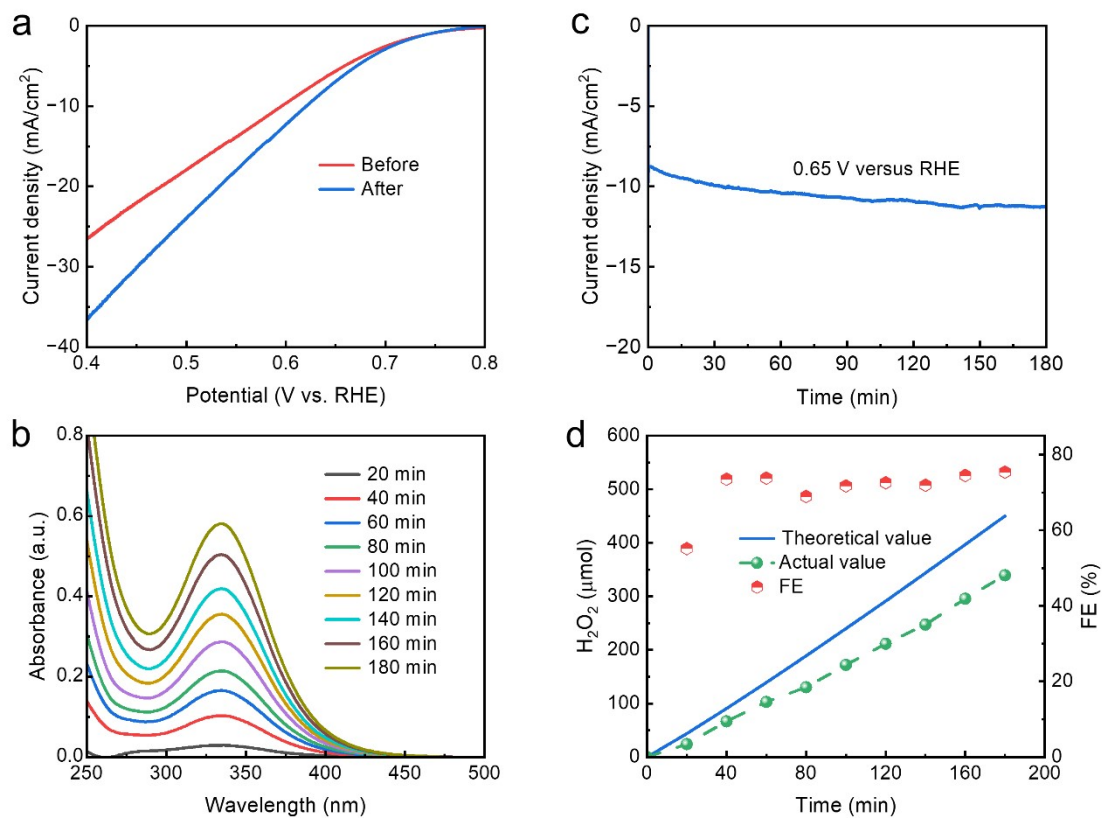

**Figure S3.** (a) J-V curves of the carbon cloth (CC) loaded with 0.05 mg/cm<sup>2</sup> CMK-3 catalyst measured in 1 M KOH electrolyte at 283 K before and after the stability test. (b) Steady-state current measured at 0.65 V vs. RHE in 1 M KOH electrolyte at 283 K. (c) UV-vis absorption spectra of the electrolyte at different times during the stability test using the Fe<sup>2+</sup> colorimetric method. (d) Amount of H<sub>2</sub>O<sub>2</sub> produced and the calculated Faradaic efficiency (FE) of the CC/CMK-3 cathode.

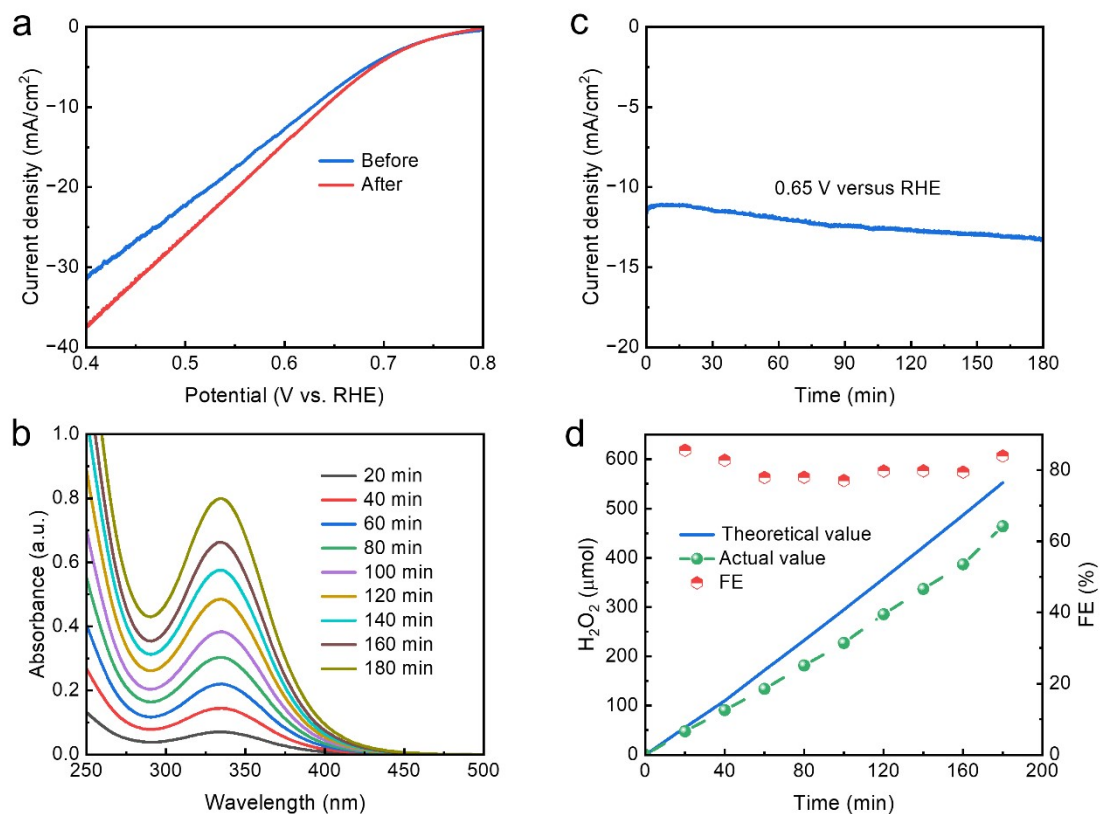

**Figure S4.** (a) J-V curves of the carbon cloth (CC) loaded with 0.11 mg/cm<sup>2</sup> CMK-3 catalyst measured in 1 M KOH electrolyte at 283 K before and after the stability test. (b) Steady-state current measured at 0.65 V vs. RHE in 1 M KOH electrolyte at 283 K. (c) UV-vis absorption spectra of the electrolyte at different times during the stability test using the Fe<sup>2+</sup> colorimetric method. (d) Amount of H<sub>2</sub>O<sub>2</sub> produced and the calculated Faradaic efficiency (FE) of the CC/CMK-3 cathode.

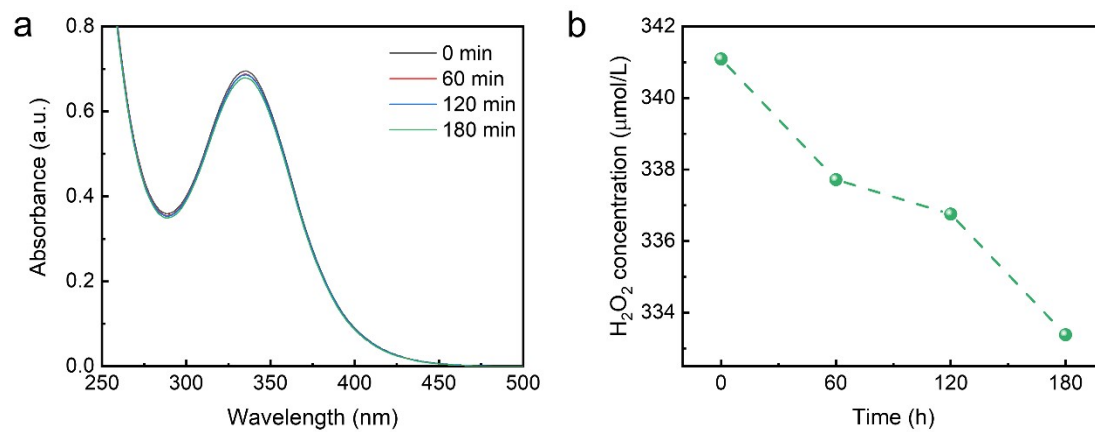

**Figure S5.** Self-decomposition of H<sub>2</sub>O<sub>2</sub> in KOH electrolyte at 283 K. (a) UV-vis absorption spectra of the electrolyte measured every 60 min using the Fe<sup>2+</sup> colorimetric method. (b) Change of H<sub>2</sub>O<sub>2</sub> concentration with time.

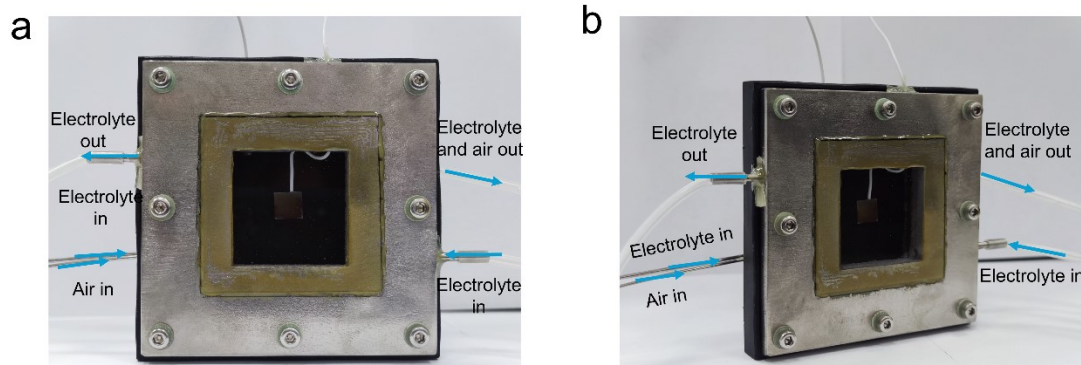

**Figure S6.** Photographs of the assembled Mg:Ta<sub>3</sub>N<sub>5</sub>||Nafion||CP/CMK-3 device.

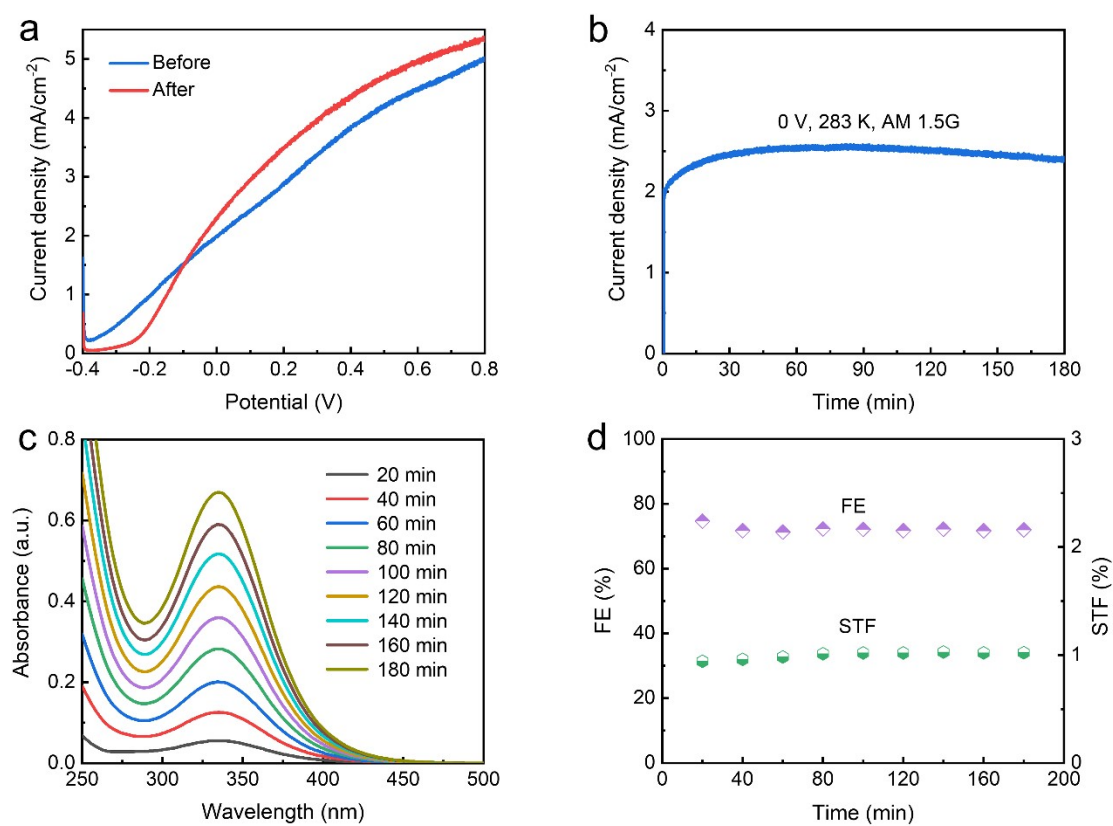

**Fig. S7.** (a) J-V curves of the Ta<sub>3</sub>N<sub>5</sub>||Nafion||CC/CMK-3 device measured in 1 M KOH electrolyte at 283 K before and after the stability test under AM1.5G simulated sunlight. Undoped Ta<sub>3</sub>N<sub>5</sub> modified with NiCoFe-B<sub>i</sub> co-catalyst was used as the photoanode. (b) Photocurrent of the Ta<sub>3</sub>N<sub>5</sub>||Nafion||CC/CMK-3 device measured at zero bias in 1 M KOH electrolyte at 283 K under AM1.5G simulated sunlight. (c) UV-vis absorption spectra of the electrolyte measured every 20 min during the stability test using the Fe<sup>2+</sup> colorimetric method. (d) FE and STF of the Ta<sub>3</sub>N<sub>5</sub>||Nafion||CC/CMK-3 device.

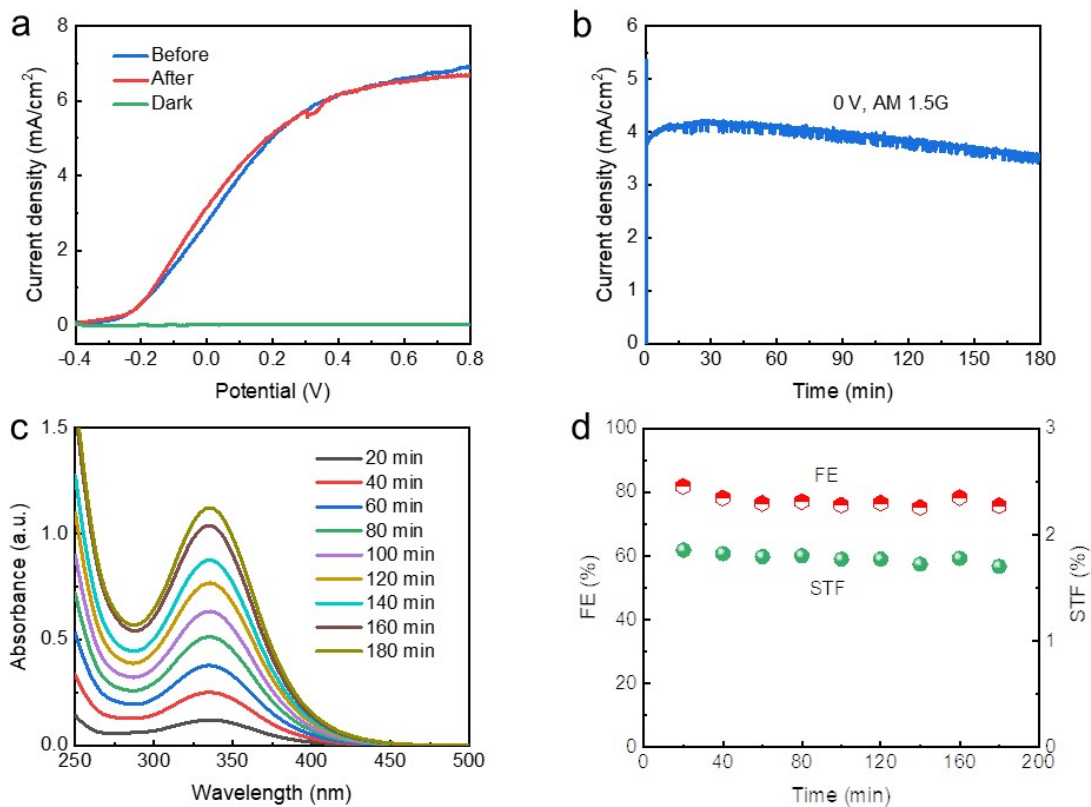

**Fig. S8.** (a) J-V curves of the Mg:Ta<sub>3</sub>N<sub>5</sub>||CC/CMK-3 device without a Nafion membrane measured in 1 M KOH electrolyte at 283 K before and after the stability test under AM1.5G simulated sunlight and in the dark. (b) Photocurrent of the Mg:Ta<sub>3</sub>N<sub>5</sub>||CC/CMK-3 device measured at zero bias in 1 M KOH electrolyte at 283 K under AM1.5G simulated sunlight. (c) UV-vis absorption spectra of the electrolyte measured every 20 min during the stability test using the Fe<sup>2+</sup> colorimetric method. (d) FE and STF of the Mg:Ta<sub>3</sub>N<sub>5</sub>||CC/CMK-3 device.

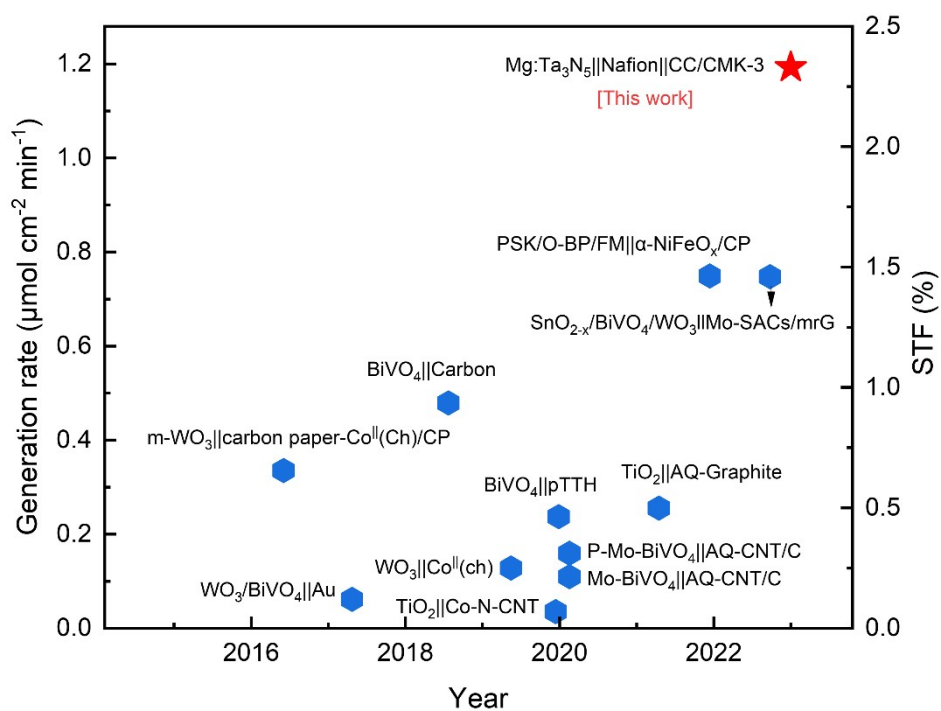

**Fig. S9.** Summary of the performance of the PEC devices for bias-free H<sub>2</sub>O<sub>2</sub> production. The left and right axes show the H<sub>2</sub>O<sub>2</sub> production rate and the corresponding STF of the devices, respectively. More details are provided in Table S1.

**Table S1.** Comparison of recent-reported bias-free PEC systems for the production of H<sub>2</sub>O<sub>2</sub>. (OER: oxygen evolution reaction, ORR: oxygen reduction reaction to form H<sub>2</sub>O<sub>2</sub>, WOR: water oxidation reaction to form H<sub>2</sub>O<sub>2</sub>)

| <b>System components (anode  cathode)</b>                             | <b>Generation rate (<math>\mu\text{mol}^*\text{cm}^{-2}*\text{min}^{-1}</math>)</b> | <b>STF (%)</b> | <b>Anode reaction</b> | <b>Cathode reaction</b> | <b>Year</b> | <b>Ref.</b> |
|-----------------------------------------------------------------------|-------------------------------------------------------------------------------------|----------------|-----------------------|-------------------------|-------------|-------------|
| <b>m-WO<sub>3</sub>  CP/Co<sup>II</sup> (Ch)</b>                      | 0.28                                                                                | 0.55           | OER                   | ORR                     | 2016        | 4           |
| <b>WO<sub>3</sub>/BiVO<sub>4</sub>  Au</b>                            | 0.0614                                                                              | 0.12           | OER                   | ORR                     | 2016        | 5           |
| <b>BiVO<sub>4</sub>  carbon</b>                                       | 0.48                                                                                | 0.94           | WOR                   | OER                     | 2018        | 6           |
| <b>TiO<sub>2</sub>  Co-N-CNT</b>                                      | 0.035                                                                               | 0.069          | OER                   | ORR                     | 2019        | 7           |
| <b>WO<sub>3</sub>  Co<sup>II</sup> (ch)</b>                           | 0.13                                                                                | 0.25           | OER                   | ORR                     | 2019        | 8           |
| <b>BiVO<sub>4</sub>  pTTH</b>                                         | 0.238                                                                               | 0.46           | OER                   | ORR                     | 2020        | 9           |
| <b>P-Mo-BiVO<sub>4</sub>  AQ-CNT/C</b>                                | 0.16                                                                                | 0.31           | WOR                   | OER                     | 2020        | 10          |
| <b>TiO<sub>2</sub>  AQ-Graphite</b>                                   | 0.26                                                                                | 0.5            | OER                   | ORR                     | 2021        | 11          |
| <b>PSK/O-BP/FM   <math>\alpha</math>-NiFeO<sub>x</sub>/CP</b>         | 0.66                                                                                | 1.46           | OER                   | ORR                     | 2021        | 12          |
| <b>SnO<sub>2-x</sub>/BiVO<sub>4</sub>/WO<sub>3</sub>  Mo-SACs/mrG</b> | 0.76                                                                                | 1.463          | WOR                   | ORR                     | 2022        | 13          |
| <b>Mg:Ta<sub>3</sub>N<sub>5</sub>  Nafion CC/CMK-3</b>                | 1.19                                                                                | 2.33           | OER                   | ORR                     | 2023        | This work   |



## Supplementary References

1. Y. Xiao, C. Feng, J. Fu, F. Wang, C. Li, V. F. Kunzelmann, C.-M. Jiang, M. Nakabayashi, N. Shibata, I. D. Sharp, K. Domen and Y. Li, *Nat. Catal.*, 2020, **3**, 932-940.
2. K. Fuku, Y. Miyase, Y. Miseki, T. Gunji and K. Sayama, *ChemistrySelect*, 2016, **1**, 5721-5726.
3. K. Fuku and K. Sayama, *Chem. Commun.*, 2016, **52**, 5406.
4. K. Mase, M. Yoneda, Y. Yamada and S. Fukuzumi, *Nat. Commun.*, 2016, **7**, 11470.
5. K. Fuku, Y. Miyase, Y. Miseki, T. Funaki, T. Gunji and K. Sayama, *Chem. Asian J.*, 2017, **12**, 1111-1119.
6. X. Shi, Y. Zhang, S. Siahrostami and X. Zheng, *Adv. Energy Mater.*, 2018, **8**, 1801158.
7. M. Ko, L. T. M. Pham, Y. J. Sa, J. Woo, T. V. T. Nguyen, J. H. Kim, D. Oh, P. Sharma, J. Ryu, T. J. Shin, S. H. Joo, Y. H. Kim and J. W. Jang, *Nat. Commun.*, 2019, **10**, 5123.
8. J. Liu, Y. Zou, B. Jin, K. Zhang and J. H. Park, *ACS Energy Lett.*, 2019, **4**, 3018-3027.
9. W. Fan, B. Zhang, X. Wang, W. Ma, D. Li, Z. Wang, M. Dupuis, J. Shi, S. Liao and C. Li, *Energy Environ. Sci.*, 2020, **13**, 238-245.
10. T. H. Jeon, H. Kim, H.-i. Kim and W. Choi, *Energy Environ. Sci.*, 2020, **13**, 1730-1742.
11. T. H. Jeon, B. Kim, C. Kim, C. Xia, H. Wang, P. J. J. Alvarez and W. Choi, *Energy Environ. Sci.*, 2021, **14**, 3110-3119.
12. C. Dong, Y. Yang, X. Hu, Y. Cho, G. Jang, Y. Ao, L. Wang, J. Shen, J. H. Park and K. Zhang, *Nat. Commun.*, 2022, **13**, 4982.
13. R. Mehrotra, D. Oh and J. W. Jang, *Nat. Commun.*, 2021, **12**, 6644.
